# Supplementary material for: Elemental Fingerprinting Combined with Machine Learning Techniques as a Powerful Tool for Geographical Discrimination of Honeys from Nearby Regions
Source: MDPI journal article supplement (doi:10.3390/foods13020243), 2024-01-12

# **Elemental fingerprinting combined with machine learning techniques as a powerful tool for geographical discrimination of honeys from nearby regions**

**Andrea Mara<sup>1</sup>, Matteo Migliorini<sup>2</sup>, Marco Ciulu<sup>2</sup>, Roberto Chignola<sup>2</sup>, Carla Egidio<sup>3</sup>, Oscar Nunez<sup>3,4,5</sup>, Sònia Sentellas<sup>3,4,5</sup>, Javier Saurina<sup>3,4</sup>, Marco Caredda<sup>6</sup>, Mario A. Deroma<sup>7</sup>, Sara Deidda<sup>1</sup>, Ilaria Langasco<sup>1</sup>, Maria I. Pilo<sup>1</sup>, Nadia Spano<sup>1</sup>, and Gavino Sanna<sup>1</sup>.**

<sup>1</sup> Department of Chemical, Physical, Mathematical and Natural Sciences. University of Sassari. Via Vienna 2, 07100 Sassari, Italy.

<sup>2</sup> Department of Biotechnology, Food Analysis Lab, University of Verona. Strada le Grazie 15, 37134 Verona, Italy.

<sup>3</sup> Department of Chemical Engineering and Analytical Chemistry, University of Barcelona. Martí i Franquès 1-11, 08028 Barcelona, Spain.

<sup>4</sup> Research Institute in Food Nutrition and Food Safety, University of Barcelona, Recinte Torribera, Av. Prat de la Riba 171, Edifici de Recerca (Gaudí), Santa Coloma de Gramenet, E08921 Barcelona, Spain.

<sup>5</sup> Serra Húnter Fellow, Departament de Recerca i Universitats, Generalitat de Catalunya, Via Laietana 2, E08003 Barcelona, Spain.

<sup>6</sup> Department of Animal Science, AGRIS Sardegna, Loc. Bonassai, 07100 Sassari, Italy

<sup>7</sup> Department of Agriculture, University of Sassari, Viale Italia, 39A, 07100 Sassari, Italy

\*Correspondence: sanna@uniss.it; Tel.: (+39) 079229500.

## Supplementary Material

|                                                                                                                                                                                                            |    |
|------------------------------------------------------------------------------------------------------------------------------------------------------------------------------------------------------------|----|
| Table S1. Operational conditions of microwave acid digestion and dry ashing for honey elemental analysis.....                                                                                              | 3  |
| Table S2. Inductively Coupled Plasma – Mass Spectrometry (ICP-MS) instrumental conditions for honey elemental analysis.....                                                                                | 4  |
| Table S3. Elemental settings and validation parameters for the ICP-MS determination of macroelements and lanthanides in honey. ....                                                                        | 5  |
| Table S4. Trueness evaluation for the ICP-MS determination of macroelements and lanthanides by means analysis of certified reference materials (NIST SRM 1515 apple leaves and BCR 668 mussel tissue)..... | 6  |
| Table S5. Concentration of macroelements, trace elements, toxic elements and lanthanides in honeys from Sardinia and Spain (min; mean $\pm$ sd; max).....                                                  | 7  |
| Table S6. Random forest (RF) accuracy table for each set of predictors tested: botanical origin.....                                                                                                       | 9  |
| Table S7. RF accuracy table for each set of predictors tested: geographical and botanical origin.....                                                                                                      | 10 |
| Table S8. RF accuracy table for each set of predictors tested: geographical origin.....                                                                                                                    | 11 |
| Figure S1. Principal Component Analysis (PCA) performed using autoscaling as data pre-treatment. (A) Loading plot; (B) Score plot. ....                                                                    | 12 |
| Figure S2. Proportion of variance (PCA using centered log-ratio transformation).....                                                                                                                       | 13 |

**Table S1. Operational conditions of microwave acid digestion and dry ashing for honey elemental analysis.**

| <b>Microwave acid digestion (ultraWAVE Milestone)</b> |         |            |                  |
|-------------------------------------------------------|---------|------------|------------------|
|                                                       | Step    | Time (min) | Temperature (°C) |
| 1st                                                   | Heating | 25         | 240              |
| 2nd                                                   | Holding | 10         | 240              |
| 3rd                                                   | Cooling | ca. 30     | < 40             |

| <b>Dry ashing (Controller P320 Nabertherm)</b> |         |            |                  |
|------------------------------------------------|---------|------------|------------------|
|                                                | Step    | Time (min) | Temperature (°C) |
| 1st                                            | Heating | 10         | 105              |
| 2nd                                            | Heating | 30         | 150              |
| 3rd                                            | Holding | 30         | 150              |
| 4th                                            | Heating | 30         | 200              |
| 5th                                            | Holding | 30         | 200              |
| 6th                                            | Heating | 360        | 600              |
| 7th                                            | Holding | 360        | 600              |

**Table S2. Inductively Coupled Plasma – Mass Spectrometry (ICP-MS) instrumental conditions for honey elemental analysis.**

| ICP-MS NexION 300X Perkin Elmer settings |                   |                        |                                                          |
|------------------------------------------|-------------------|------------------------|----------------------------------------------------------|
| RF power                                 | 1300              | KED mode cell entrance | -8.0                                                     |
| Ar plasma flow                           | 18.0              | KED mode cell exit     | -25.0                                                    |
| Ar auxiliary flow                        | 1.20              | Resolution (Da)        | 0.7                                                      |
| Ar nebulizer flow                        | 0.91              | Scan mode              | Peak hopping                                             |
| Nebulizer                                | Meinhardt®, glass | Detector mode          | Dual                                                     |
| Spray chamber                            | Cyclonic, glass   | Dwell time (ms)        | 50                                                       |
| Skimmer and                              | Nickel            | Number of points per   | 3                                                        |
| Sampling depth                           | 0                 | Acquisition time (s)   | 6                                                        |
| Deflector voltage                        | -8.00             | Acquisition dead time  | 35                                                       |
| Analog stage                             | -1750             | KED gas                | Helium 99.999%                                           |
| Pulse stage voltage                      | 1350              | Masses of optimization | <sup>7</sup> Li, <sup>115</sup> In and <sup>205</sup> Tl |

**Table S3. Elemental settings and validation parameters for the ICP-MS determination of macroelements and lanthanides in honey.**

**Macroelements**

| Element          | Mode | Calibration Range (mg dm <sup>-3</sup> ) | R <sup>2</sup> | LoD (mg kg <sup>-1</sup> ) | LoQ (mg kg <sup>-1</sup> ) | CV% <sub>r</sub> | CV% <sub>IP</sub> |
|------------------|------|------------------------------------------|----------------|----------------------------|----------------------------|------------------|-------------------|
| <sup>23</sup> Na | KED  | 0.05 - 5                                 | 0.9998         | 0.10                       | 0.30                       | 6                | 8                 |
| <sup>24</sup> Mg | KED  | 0.01 – 10                                | 0.9996         | 0.26                       | 0.80                       | 2                | 5                 |
| <sup>39</sup> K  | KED  | 0.1 – 100                                | 0.9998         | 0.70                       | 0.20                       | 2                | 6                 |
| <sup>43</sup> Ca | KED  | 0.05 - 50                                | 0.9997         | 0.16                       | 0.50                       | 2                | 5                 |

He flow rate = 3.6 cm<sup>3</sup> min<sup>-1</sup>

**Lanthanides**

| Element           | Mode | Calibration Range (µg dm <sup>-3</sup> ) | R <sup>2</sup> | LoD (µg kg <sup>-1</sup> ) | LoQ (µg kg <sup>-1</sup> ) | CV% <sub>r</sub> | CV% <sub>IP</sub> |
|-------------------|------|------------------------------------------|----------------|----------------------------|----------------------------|------------------|-------------------|
| <sup>139</sup> La | KED  | 0.001 - 10                               | 0.9999         | 0.015                      | 0.050                      | 15               | 21                |
| <sup>140</sup> Ce | KED  | 0.001 - 10                               | 0.9998         | 0.024                      | 0.079                      | 15               | 18                |
| <sup>141</sup> Pr | KED  | 0.001 - 10                               | 0.9999         | 0.006                      | 0.020                      | 15               | 18                |
| <sup>142</sup> Nd | KED  | 0.001 - 10                               | 0.9993         | 0.018                      | 0.059                      | 16               | 19                |
| <sup>152</sup> Sm | KED  | 0.001 - 10                               | 0.9997         | 0.003                      | 0.010                      | 11               | 16                |
| <sup>153</sup> Eu | KED  | 0.001 - 10                               | 0.9998         | 0.003                      | 0.010                      | 15               | 16                |
| <sup>158</sup> Gd | KED  | 0.001 - 10                               | 0.9999         | 0.003                      | 0.010                      | 6                | 15                |
| <sup>159</sup> Tb | KED  | 0.001 - 10                               | 0.9996         | 0.001                      | 0.003                      | 7                | 13                |
| <sup>164</sup> Dy | KED  | 0.001 - 10                               | 0.9999         | 0.003                      | 0.010                      | 8                | 12                |
| <sup>165</sup> Ho | KED  | 0.001 - 10                               | 0.9999         | 0.003                      | 0.010                      | 12               | 16                |
| <sup>166</sup> Er | KED  | 0.001 - 10                               | 0.9996         | 0.003                      | 0.010                      | 8                | 18                |
| <sup>169</sup> Tm | KED  | 0.001 - 10                               | 0.9999         | 0.001                      | 0.003                      | 3                | 16                |
| <sup>174</sup> Yb | KED  | 0.001 - 10                               | 0.9999         | 0.001                      | 0.004                      | 10               | 17                |
| <sup>175</sup> Lu | KED  | 0.001 - 10                               | 0.9998         | 0.001                      | 0.002                      | 5                | 18                |

He flow rate = 4.6 cm<sup>3</sup> min<sup>-1</sup>

Macroelements and lanthanides were determined after microwave acid digestion and dry ashing, respectively.

Detailed information about the instrumental parameters and elemental settings for trace and toxic elements analysis, method assessment, performance, quality control, and validation can be found in ref. [38].

**Table S4. Trueness evaluation for the ICP-MS determination of macroelements and lanthanides by means of analysis of certified reference materials (NIST SRM 1515 apple leaves and BCR 668 mussel tissue).**

NIST SRM 1515 apple leaves

| Element | Certified value<br>(mg kg <sup>-1</sup> ) | Experimental value<br>(mg kg <sup>-1</sup> ) (n=3) | Recovery %* |
|---------|-------------------------------------------|----------------------------------------------------|-------------|
| Na      | 24.4 ± 2.1                                | 23 ± 3                                             | 105 ± 15    |
| Mg      | 2710 ± 120                                | 2600 ± 200                                         | 104 ± 7     |
| K       | 16080 ± 210                               | 15300 ± 900                                        | 105 ± 6     |
| Ca      | 15250 ± 100                               | 15700 ± 900                                        | 97 ± 6      |

BCR 668 mussel tissue

| Element | Certified value<br>(µg kg <sup>-1</sup> ) | Experimental value<br>(µg kg <sup>-1</sup> ) (n=3) | Recovery %* |
|---------|-------------------------------------------|----------------------------------------------------|-------------|
| La      | 80 ± 6                                    | 75 ± 4                                             | 94 ± 8      |
| Ce      | 89 ± 7                                    | 84 ± 9                                             | 90 ± 10     |
| Pr      | 12.3 ± 1.1                                | 11.9 ± 1.5                                         | 100 ± 10    |
| Nd      | 54 ± 4                                    | 54 ± 9                                             | 100 ± 30    |
| Sm      | 11.2 ± 0.8                                | 11.9 ± 0.9                                         | 110 ± 10    |
| Eu      | 2.79 ± 0.16                               | 2.6 ± 0.5                                          | 90 ± 20     |
| Gd      | 13.0 ± 0.6                                | 14 ± 1                                             | 110 ± 10    |
| Tb      | 1.62 ± 0.12                               | 1.73 ± 0.08                                        | 107 ± 9     |
| Dy      | 8.9 ± 0.6                                 | 9.7 ± 0.3                                          | 109 ± 8     |
| Ho      | 1.8 ± 0.6                                 | 1.9 ± 0.8                                          | 105 ± 20    |
| Er      | 4.5 ± 0.5                                 | 4.3 ± 0.2                                          | 100 ± 10    |
| Tm      | 0.48 ± 0.08                               | 0.5 ± 0.03                                         | 110 ± 20    |
| Yb      | 2.8 ± 0.5                                 | 2.8 ± 0.2                                          | 100 ± 20    |
| Lu      | 0.389 ± 0.024                             | 0.44 ± 0.04                                        | 110 ± 10    |

\* Recoveries has been calculated using unrounded experimental concentrations

**Table S5. Concentration of macroelements, trace elements, toxic elements and lanthanides in honeys from Sardinia and Spain (min; mean  $\pm$  sd; max).**

**Macroelements(mg kg<sup>-1</sup>)**

| Elements | SPA ROS<br>(n = 26)    | SPA MUL<br>(n = 34)        | SPA EUC<br>(n = 13)       | ITA THI<br>(n = 39)     | ITA STR<br>(n = 31)       | ITA ROS<br>(n = 6)     | ITA MUL<br>(n = 35)      | ITA EUC<br>(n = 30)    | ITA ASP<br>(n = 33)   |
|----------|------------------------|----------------------------|---------------------------|-------------------------|---------------------------|------------------------|--------------------------|------------------------|-----------------------|
| Na       | 3; 20 $\pm$ 10; 35     | 4; 20 $\pm$ 10; 48         | 13; 40 $\pm$ 10; 56       | 11; 50 $\pm$ 20; 99     | 3; 20 $\pm$ 20; 68        | 6.1; 8 $\pm$ 3; 12.9   | 10; 60 $\pm$ 40; 150     | 20; 110 $\pm$ 60; 240  | 1; 16 $\pm$ 8; 37     |
| Mg       | 2; 12 $\pm$ 6; 29      | 3; 30 $\pm$ 20; 85         | 7; 40 $\pm$ 15; 62        | 1; 9 $\pm$ 4; 19        | 2; 12 $\pm$ 8; 32         | 3.5; 5 $\pm$ 1.5; 6.6  | 4; 12 $\pm$ 7; 27        | 2; 13 $\pm$ 5; 23      | 2; 7 $\pm$ 4; 16      |
| K        | 60; 300 $\pm$ 150; 650 | < LoD; 600 $\pm$ 400; 1700 | 200; 1000 $\pm$ 400; 1600 | 90; 600 $\pm$ 300; 1270 | 200; 1500 $\pm$ 800; 3000 | 110; 190 $\pm$ 90; 330 | 140; 550 $\pm$ 300; 1080 | 70; 500 $\pm$ 200; 880 | 10; 200 $\pm$ 90; 400 |
| Ca       | 4; 30 $\pm$ 10; 51     | 8; 50 $\pm$ 25; 97         | 11; 80 $\pm$ 30; 120      | 4; 30 $\pm$ 10; 59      | 10; 70 $\pm$ 40; 150      | 11; 20 $\pm$ 20; 52    | 10; 35 $\pm$ 15; 70      | 10; 70 $\pm$ 30; 130   | 2; 14 $\pm$ 8; 33     |

**Lanthanides (ng kg<sup>-1</sup>)**

| Elements | SPA ROS<br>(n = 26)          | SPA MUL<br>(n = 34)          | SPA EUC<br>(n = 13)            | ITA THI<br>(n = 39)             | ITA STR<br>(n = 31)             | ITA ROS<br>(n = 6)            | ITA MUL<br>(n = 35)           | ITA EUC<br>(n = 30)              | ITA ASP<br>(n = 33)          |
|----------|------------------------------|------------------------------|--------------------------------|---------------------------------|---------------------------------|-------------------------------|-------------------------------|----------------------------------|------------------------------|
| La       | 200; 1100 $\pm$ 300;<br>1800 | 800; 1600 $\pm$ 800;<br>3500 | 900; 2100 $\pm$ 900;<br>4100   | 1200; 5000 $\pm$ 2000;<br>9400  | 800; 300 $\pm$ 2000;<br>7900    | 360; 360 $\pm$ 10;<br>370     | 400; 1300 $\pm$ 800;<br>3300  | 1000; 7000 $\pm$ 3000;<br>14000  | 200; 1100 $\pm$ 500;<br>2000 |
| Ce       | 300; 1400 $\pm$ 400;<br>2300 | 900; 1600 $\pm$ 500;<br>3100 | 1300; 3000 $\pm$ 1500;<br>6100 | 2000; 8000 $\pm$ 4000;<br>18000 | 2000; 5000 $\pm$ 3000;<br>15000 | 400; 800 $\pm$ 200;<br>900    | 400; 2000 $\pm$ 1000;<br>4600 | 1000; 12000 $\pm$ 6000;<br>23000 | 300; 1400 $\pm$ 600;<br>2700 |
| Pr       | 100; 300 $\pm$ 100;<br>400   | 200; 400 $\pm$ 200;<br>1000  | 200; 600 $\pm$ 300;<br>1200    | 300; 1300 $\pm$ 600;<br>2600    | 200; 900 $\pm$ 600;<br>2500     | 94; 95 $\pm$ 1;<br>97         | 100; 300 $\pm$ 200;<br>800    | 200; 1900 $\pm$ 900;<br>3900     | 100; 300 $\pm$ 100;<br>600   |
| Nd       | 400; 1000 $\pm$ 300;<br>1700 | 600; 1500 $\pm$ 900;<br>3700 | 900; 2500 $\pm$ 1000;<br>5100  | 1300; 5500 $\pm$ 3000;<br>11400 | 900; 4000 $\pm$ 3000;<br>10800  | 300; 500 $\pm$ 200;<br>700    | 300; 1400 $\pm$ 800;<br>3100  | 1000; 8000 $\pm$ 4000;<br>15000  | 300; 1100 $\pm$ 500;<br>2200 |
| Sm       | 100; 200 $\pm$ 100;<br>300   | 100; 300 $\pm$ 200;<br>1000  | 200; 600 $\pm$ 300;<br>1200    | 300; 1100 $\pm$ 600;<br>2400    | 200; 800 $\pm$ 600;<br>2300     | 100; 100 $\pm$ 100;<br>200    | 100; 400 $\pm$ 300;<br>1200   | 100; 1600 $\pm$ 700;<br>3000     | 100; 200 $\pm$ 100;<br>500   |
| Eu       | 20; 100 $\pm$ 30;<br>140     | 100; 300 $\pm$ 200;<br>600   | 100; 300 $\pm$ 300;<br>800     | 100; 600 $\pm$ 300;<br>1200     | 100; 400 $\pm$ 300;<br>1000     | 100; 100 $\pm$ 100;<br>200    | 100; 500 $\pm$ 400;<br>1500   | 100; 700 $\pm$ 300;<br>1100      | < LoD; 100 $\pm$ 100;<br>200 |
| Gd       | < LoD; 200 $\pm$ 10;<br>210  | 100; 200 $\pm$ 100;<br>700   | 100; 500 $\pm$ 200;<br>900     | 200; 900 $\pm$ 400;<br>1800     | 200; 700 $\pm$ 500;<br>1800     | 100; 100 $\pm$ 100;<br>200    | 100; 400 $\pm$ 200;<br>800    | 100; 1300 $\pm$ 600;<br>2600     | < LoD; 200 $\pm$ 100;<br>400 |
| Tb       | 10; 20 $\pm$ 10;<br>21       | 20; 40 $\pm$ 20;<br>90       | < LoD; 100 $\pm$ 2;<br>110     | < LoD; 100 $\pm$ 100;<br>200    | < LoD; 100 $\pm$ 100;<br>200    | 23.6; 23.9 $\pm$ 0.3;<br>24.2 | < LoD; 100 $\pm$ 100;<br>200  | < LoD; 200 $\pm$ 100;<br>300     | 10; 30 $\pm$ 10;<br>50       |
| Dy       | 30; 110 $\pm$ 30;<br>150     | 100; 200 $\pm$ 100;<br>500   | 100; 300 $\pm$ 200;<br>600     | 100; 600 $\pm$ 300;<br>1200     | 100; 400 $\pm$ 300;<br>1100     | 50; 90 $\pm$ 30;<br>130       | < LoD; 300 $\pm$ 100;<br>600  | < LoD; 800 $\pm$ 300;<br>1500    | < LoD; 100 $\pm$ 100;<br>200 |
| Ho       | 10; 20 $\pm$ 10;<br>30       | 10; 30 $\pm$ 20;<br>80       | 20; 50 $\pm$ 30;<br>100        | < LoD; 100 $\pm$ 100;<br>200    | < LoD; 100 $\pm$ 100;<br>200    | 19.2; 19.5 $\pm$ 0.2;<br>19.8 | 20; 40 $\pm$ 20;<br>90        | < LoD; 100 $\pm$ 100;<br>200     | 10; 20 $\pm$ 10;<br>30       |
| Er       | 10; 50 $\pm$ 10;<br>70       | < LoD; 100 $\pm$ 100;<br>200 | < LoD; 100 $\pm$ 100;<br>200   | 100; 200 $\pm$ 100;<br>500      | < LoD; 200 $\pm$ 100;<br>400    | 29; 29 $\pm$ 1;<br>29         | < LoD; 100 $\pm$ 100;<br>200  | < LoD; 300 $\pm$ 100;<br>600     | 10; 50 $\pm$ 20;<br>100      |
| Tm       | 6; 7 $\pm$ 10;<br>9          | < LoD; 10 $\pm$ 10;<br>30    | 10; 20 $\pm$ 10;<br>30         | 10; 30 $\pm$ 20; 6<br>0         | 10; 20 $\pm$ 20;<br>60          | 3.6; 3.6 $\pm$ 0.1;<br>3.7    | < LoD; 10 $\pm$ 1;<br>11      | 10; 50 $\pm$ 20;<br>80           | 4; 7 $\pm$ 3;<br>14          |
| Yb       | 10; 40 $\pm$ 10;<br>60       | < LoD; 100 $\pm$ 10;<br>200  | < LoD; 100 $\pm$ 100;<br>200   | < LoD; 200 $\pm$ 100;<br>400    | < LoD; 100 $\pm$ 100;<br>400    | 24.6; 24.9 $\pm$ 0.3;<br>25.2 | < LoD; 100 $\pm$ 100;<br>200  | < LoD; 300 $\pm$ 100;<br>500     | 10; 40 $\pm$ 20;<br>70       |
| Lu       | 5; 5 $\pm$ 1;<br>7           | < LoD; 10 $\pm$ 10;<br>20    | < LoD; 10 $\pm$ 10;<br>30      | 10; 30 $\pm$ 20;<br>60          | 10; 20 $\pm$ 20;<br>60          | 4.3; 4.4 $\pm$ 0.1;<br>4.4    | < LoD; 10 $\pm$ 10;<br>20     | < LoD; 40 $\pm$ 20;<br>80        | 3; 7 $\pm$ 3;<br>12          |

Trace and toxic elements ( $\mu\text{g kg}^{-1}$ )

| Elements | SPA ROS<br>(n = 26)            | SPA MUL<br>(n = 34)              | SPA EUC<br>(n = 13)            | ITA THI<br>(n = 39)             | ITA STR<br>(n = 31)         | ITA ROS<br>(n = 6)         | ITA MUL<br>(n = 35)         | ITA EUC<br>(n = 30)           | ITA ASP<br>(n = 33)             |
|----------|--------------------------------|----------------------------------|--------------------------------|---------------------------------|-----------------------------|----------------------------|-----------------------------|-------------------------------|---------------------------------|
| Co       | 1.2; 3 $\pm$ 2; 7              | 2; 11 $\pm$ 9; 34                | 6; 14 $\pm$ 6; 24              | 1.4; 5 $\pm$ 3; 13.2            | 1.1; 1.8 $\pm$ 0.1; 3       | 4; 6 $\pm$ 3; 9.1          | 1.1; 3 $\pm$ 1; 7           | 2; 4 $\pm$ 1; 6.7             | 1.2; 3 $\pm$ 1; 6.4             |
| Cr       | < LoD                          | < LoD                            | < LoD                          | < LoD                           | < LoD                       | < LoD                      | < LoD                       | < LoD                         | < LoD                           |
| Cu       | 170; 220 $\pm$ 80; 490         | 100; 400 $\pm$ 300; 1400         | 100; 700 $\pm$ 400; 1400       | 70; 130 $\pm$ 10; 240           | 80; 110 $\pm$ 10; 190       | 110; 150 $\pm$ 10; 200     | 90; 180 $\pm$ 70; 340       | 80; 140 $\pm$ 10; 220         | 70; 120 $\pm$ 10; 180           |
| Fe       | < LoD; 1500 $\pm$ 300;<br>2100 | < LoD; 2400 $\pm$ 1000;<br>3600  | < LoD; 2800 $\pm$ 900;<br>4400 | 120; 300 $\pm$ 200;<br>730      | 110; 190 $\pm$ 10;<br>360   | < LoD                      | 590; 800 $\pm$ 300;<br>1420 | 100; 500 $\pm$ 200;<br>840    | 100; 180 $\pm$ 10;<br>320       |
| Mn       | 50; 300 $\pm$ 200;<br>710      | < LoD; 3000 $\pm$ 3000;<br>12000 | 900; 4000 $\pm$ 2000;<br>7200  | 40; 200 $\pm$ 100;<br>460       | 40; 200 $\pm$ 100;<br>470   | 40; 110 $\pm$ 80;<br>240   | 70; 300 $\pm$ 100;<br>730   | 100; 3000 $\pm$ 1500;<br>5100 | 40; 120 $\pm$ 70;<br>330        |
| Mo       | < LoD                          | < LoD                            | 4.6; 5.4 $\pm$ 0.1; 6.6        | < LoD                           | < LoD                       | < LoD                      | < LoD                       | < LoD                         | < LoD                           |
| Ni       | 18; 30 $\pm$ 10; 46            | 20; 70 $\pm$ 60; 280             | 20; 200 $\pm$ 100; 480         | 11; 22 $\pm$ 1; 44              | 10; 16 $\pm$ 1; 28          | 16; 25 $\pm$ 10; 40        | 11; 20 $\pm$ 10; 52         | 11; 18 $\pm$ 1; 34            | 13; 22 $\pm$ 1; 34              |
| Sr       | 50; 120 $\pm$ 60; 270          | 60; 150 $\pm$ 60; 270            | 70; 210 $\pm$ 60; 270          | 18; 80 $\pm$ 20; 128            | 20; 130 $\pm$ 50; 240       | 37; 60 $\pm$ 20; 77        | 20; 80 $\pm$ 30; 170        | 20; 180 $\pm$ 60; 290         | 10; 30 $\pm$ 10; 56             |
| V        | 3; 12 $\pm$ 5; 18              | < LoD                            | 2.3; 7 $\pm$ 3; 10.6           | 0.8; 1.2 $\pm$ 0.1; 1.9         | 0.7; 0.8 $\pm$ 0.1; 1       | < LoD                      | 1.1; 1.6 $\pm$ 0.1; 2.6     | 1; 4 $\pm$ 1; 7.3             | < LoD                           |
| Zn       | 560; 900 $\pm$ 200;<br>1370    | 400; 1100 $\pm$ 400;<br>2100     | 700; 1800 $\pm$ 700;<br>2800   | 300; 700 $\pm$ 300;<br>1480     | 260; 600 $\pm$ 200;<br>1180 | 420; 600 $\pm$ 200;<br>850 | 400; 800 $\pm$ 400;<br>1900 | 330; 600 $\pm$ 150;<br>1000   | 250; 500 $\pm$ 200;<br>1000     |
| Ag       | < LoD                          | < LoD                            | < LoD                          | < LoD                           | < LoD                       | < LoD                      | < LoD                       | < LoD                         | < LoD                           |
| Ba       | 118; 138 $\pm$ 1;<br>151       | 100; 200 $\pm$ 100;<br>500       | 170; 500 $\pm$ 200;<br>720     | 80; 200 $\pm$ 100;<br>520       | 100; 500 $\pm$ 400;<br>1300 | < LoD                      | 110; 150 $\pm$ 10;<br>270   | 80; 300 $\pm$ 100;<br>540     | 70; 190 $\pm$ 90;<br>340        |
| Li       | < LoD                          | < LoD                            | < LoD                          | < LoD                           | 7.3; 12.1 $\pm$ 0.1; 16.7   | < LoD                      | < LoD                       | 7; 12 $\pm$ 1; 20             | < LoD                           |
| As       | < LoD                          | < LoD                            | 8; 9 $\pm$ 1; 11               | < LoD                           | < LoD                       | < LoD                      | < LoD                       | 7.5; 8.8 $\pm$ 0.1; 10.3      | < LoD                           |
| Be       | < LoD                          | < LoD                            | < LoD                          | < LoD                           | < LoD                       | < LoD                      | < LoD                       | < LoD                         | < LoD                           |
| Bi       | < LoD                          | < LoD                            | < LoD                          | < LoD                           | < LoD                       | < LoD                      | < LoD                       | < LoD                         | < LoD                           |
| Cd       | < LoD                          | 1.3; 1.9 $\pm$ 0.1; 3.1          | 1; 1.9 $\pm$ 0.1; 2.8          | 1.1; 1.6 $\pm$ 0.1; 2.6         | < LoD                       | < LoD                      | 1.2; 1.9 $\pm$ 0.1; 3.5     | 1; 1.9 $\pm$ 0.1; 3.4         | < LoD                           |
| Hg       | < LoD                          | < LoD                            | < LoD                          | < LoD                           | < LoD                       | < LoD                      | < LoD                       | < LoD                         | < LoD                           |
| Pb       | < LoD                          | < LoD                            | < LoD                          | 10.2; 12.7 $\pm$ 0.1; 15.1      | < LoD                       | < LoD                      | < LoD                       | 14; 19 $\pm$ 1; 27            | 13.1; 13.4 $\pm$ 0.1; 13.6      |
| Sb       | < LoD                          | < LoD                            | < LoD                          | < LoD                           | < LoD                       | < LoD                      | < LoD                       | < LoD                         | < LoD                           |
| Sn       | 9.1; 12.8 $\pm$ 0.1; 21        | 7; 15 $\pm$ 1; 29                | 10; 14 $\pm$ 1; 19             | 10; 40 $\pm$ 30; 120            | 10; 40 $\pm$ 40; 140        | 19; 24 $\pm$ 1; 27         | 8; 17 $\pm$ 8; 29           | 7; 30 $\pm$ 20; 88            | 11; 40 $\pm$ 30; 104            |
| Te       | < LoD                          | < LoD                            | < LoD                          | < LoD                           | < LoD                       | < LoD                      | < LoD                       | < LoD                         | < LoD                           |
| Tl       | < LoD                          | 1.6; 4 $\pm$ 2; 7.1              | 1; 1.7 $\pm$ 0.8; 3.1          | < LoD; 0.20 $\pm$ 0.01;<br>0.21 | 0.13; 0.1 $\pm$ 0.1; 0.15   | < LoD                      | < LoD                       | < LoD                         | < LoD; 0.20 $\pm$ 0.01;<br>0.21 |

SPA, Spain; ITA, Sardinia, Italy; ROS, rosemary; MUL, multifloral; EUC, eucalyptus; THI, thistle; STR, strawberry tree; ASP, asphodel.



**Table S6. Random forest (RF) accuracy table for each set of predictors tested: botanical origin.**

| Index | Predictors                                                                        | ASP      |       | EUC      |       | MUL      |      | ROS      |       | STR      |       | THI      |       |
|-------|-----------------------------------------------------------------------------------|----------|-------|----------|-------|----------|------|----------|-------|----------|-------|----------|-------|
|       |                                                                                   | Training | Test  | Training | Test  | Training | Test | Training | Test  | Training | Test  | Training | Test  |
| 21    | Na, Mg, K, Ca, Mn, Sr, Zn, La, Ce, Pr, Nd, Sm, Eu, Gd, Tb, Dy, Ho, Er, Tm, Yb, Lu | 73±9     | 70±10 | 78±10    | 80±9  | 40±10    | 47±7 | 70±10    | 70±10 | 70±10    | 70±10 | 74±9     | 80±10 |
| 20    | Na, Mg, K, Ca, Mn, Sr, Zn, La, Ce, Pr, Nd, Eu, Gd, Tb, Dy, Ho, Er, Tm, Yb, Lu     | 72±10    | 75±10 | 77±10    | 79±8  | 45±10    | 47±9 | 70±10    | 70±10 | 70±10    | 70±10 | 77±9     | 70±10 |
| 19    | Na, Mg, K, Ca, Mn, Sr, Zn, La, Ce, Pr, Nd, Eu, Gd, Tb, Dy, Er, Tm, Yb, Lu         | 73±10    | 80±10 | 80±10    | 79±10 | 40±10    | 48±8 | 70±10    | 75±10 | 70±10    | 70±10 | 74±8     | 75±9  |
| 18    | Na, Mg, K, Ca, Mn, Sr, Zn, La, Ce, Pr, Nd, Eu, Gd, Tb, Dy, Tm, Yb, Lu             | 73±10    | 75±10 | 79±9     | 80±8  | 50±10    | 46±8 | 70±10    | 80±10 | 70±10    | 70±10 | 76±8     | 80±10 |
| 17    | Na, Mg, K, Ca, Mn, Sr, Zn, La, Ce, Pr, Nd, Eu, Gd, Tb, Dy, Tm, Lu                 | 74±10    | 80±10 | 79±8     | 82±8  | 50±10    | 47±8 | 80±10    | 75±10 | 71±9     | 70±10 | 76±8     | 77±9  |
| 16    | Na, Mg, K, Ca, Mn, Sr, Zn, Ce, Pr, Nd, Eu, Gd, Tb, Dy, Tm, Lu                     | 74±9     | 80±10 | 80±10    | 79±9  | 40±10    | 47±8 | 70±10    | 80±10 | 71±9     | 70±10 | 75±8     | 80±10 |
| 15    | Na, Mg, K, Ca, Mn, Sr, Zn, Ce, Pr, Nd, Eu, Tb, Dy, Tm, Lu                         | 75±10    | 75±10 | 80±9     | 80±8  | 50±10    | 46±8 | 73±9     | 80±10 | 70±10    | 70±10 | 76±9     | 80±10 |
| 14    | Na, K, Ca, Mn, Sr, Zn, Ce, Pr, Nd, Eu, Tb, Dy, Tm, Lu                             | 72±8     | 80±10 | 79±9     | 80±10 | 50±10    | 49±7 | 74±9     | 80±10 | 70±10    | 70±10 | 75±8     | 80±10 |
| 13    | Na, K, Ca, Mn, Sr, Zn, Ce, Pr, Nd, Eu, Tb, Dy, Lu                                 | 75±10    | 78±9  | 80±10    | 81±9  | 50±10    | 49±7 | 70±10    | 80±10 | 70±10    | 70±10 | 75±9     | 80±10 |
| 12    | Na, K, Ca, Mn, Sr, Zn, Ce, Nd, Eu, Tb, Dy, Lu                                     | 77±9     | 80±10 | 80±10    | 80±9  | 50±10    | 49±8 | 73±9     | 80±10 | 74±9     | 70±10 | 76±8     | 75±10 |
| 11    | Na, K, Ca, Mn, Sr, Zn, Ce, Nd, Eu, Tb, Lu                                         | 76±9     | 80±10 | 80±9     | 81±9  | 50±10    | 48±8 | 72±8     | 75±10 | 73±9     | 80±10 | 77±9     | 80±10 |
| 10    | Na, K, Ca, Mn, Sr, Ce, Nd, Eu, Tb, Lu                                             | 75±10    | 78±9  | 80±9     | 81±8  | 45±10    | 47±9 | 72±9     | 70±10 | 74±9     | 80±10 | 77±8     | 80±10 |
| 9     | Na, K, Ca, Mn, Sr, Ce, Eu, Tb, Lu                                                 | 74±10    | 80±10 | 80±10    | 80±9  | 45±10    | 47±8 | 70±10    | 75±10 | 70±10    | 80±10 | 76±9     | 80±10 |
| 8     | Na, K, Ca, Mn, Sr, Ce, Eu, Lu                                                     | 77±9     | 79±9  | 80±10    | 81±9  | 45±10    | 47±7 | 70±10    | 70±10 | 78±8     | 80±10 | 76±9     | 78±9  |
| 7     | K, Ca, Mn, Sr, Ce, Eu, Lu                                                         | 77±9     | 80±10 | 80±8     | 82±9  | 40±10    | 47±8 | 70±10    | 70±10 | 69±9     | 70±10 | 75±9     | 77±9  |
| 6     | K, Mn, Sr, Ce, Eu, Lu                                                             | 74±8     | 74±10 | 78±9     | 77±9  | 50±10    | 50±8 | 70±10    | 70±10 | 70±10    | 70±10 | 74±9     | 75±10 |
| 5     | K, Mn, Sr, Ce, Lu                                                                 | 71±9     | 70±10 | 76±9     | 77±8  | 40±10    | 37±8 | 65±10    | 60±10 | 70±10    | 70±10 | 72±9     | 70±10 |
| 4     | K, Mn, Sr, Lu                                                                     | 71±9     | 73±10 | 80±10    | 80±10 | 35±10    | 39±9 | 60±10    | 65±10 | 69±9     | 70±10 | 71±9     | 70±10 |
| 3     | Mn, Sr, Lu                                                                        | 72±10    | 71±10 | 78±9     | 78±8  | 30±10    | 38±8 | 60±10    | 60±10 | 60±10    | 50±10 | 60±10    | 60±10 |
| 2     | Mn, Lu                                                                            | 58±10    | 60±10 | 80±10    | 76±10 | 40±10    | 40±9 | 60±10    | 60±10 | 40±10    | 40±10 | 50±10    | 55±10 |

Values in tables S6-S8 represent the percentage of accuracy in classifying the data in the test and the training datasets. The values have been rounded according to the relevant standard deviation.

**Table S7. RF accuracy table for each set of predictors tested: geographical and botanical origin.**

| Index | Predictors                                                                        | ITA ASP  |       | ITA EUC  |       | ITA MUL  |       | ITA ROS  |       | ITA STR  |       | ITA THI  |       | SPA EUC  |       | SPA MUL  |       | SPA ROS  |       |
|-------|-----------------------------------------------------------------------------------|----------|-------|----------|-------|----------|-------|----------|-------|----------|-------|----------|-------|----------|-------|----------|-------|----------|-------|
|       |                                                                                   | Training | Test  |
| 21    | Na, Mg, K, Ca, Mn, Sr, Zn, La, Ce, Pr, Nd, Sm, Eu, Gd, Tb, Dy, Ho, Er, Tm, Yb, Lu | 80±10    | 80±10 | 82±8     | 83±9  | 60±10    | 65±10 | 20±30    | 40±20 | 70±10    | 70±10 | 70±10    | 70±10 | 45±25    | 50±20 | 50±10    | 50±10 | 73±8     | 80±10 |
| 20    | Na, Mg, K, Ca, Mn, Sr, Zn, La, Ce, Pr, Nd, Sm, Eu, Gd, Tb, Dy, Er, Tm, Yb, Lu     | 70±10    | 75±10 | 81±9     | 80±10 | 66±9     | 60±10 | 30±35    | 35±20 | 70±10    | 70±10 | 70±9     | 72±9  | 40±30    | 50±15 | 50±10    | 50±10 | 74±9     | 80±10 |
| 19    | Na, Mg, K, Ca, Mn, Sr, Zn, La, Ce, Pr, Nd, Eu, Gd, Tb, Dy, Er, Tm, Yb, Lu         | 75±10    | 75±10 | 81±9     | 80±10 | 60±10    | 70±10 | 30±30    | 40±20 | 70±10    | 70±10 | 70±10    | 70±10 | 50±30    | 50±20 | 50±10    | 50±10 | 75±10    | 80±10 |
| 18    | Na, Mg, K, Ca, Mn, Sr, Zn, La, Ce, Pr, Nd, Eu, Gd, Tb, Dy, Tm, Yb, Lu             | 75±9     | 78±9  | 83±7     | 80±10 | 65±10    | 70±10 | 30±33    | 40±20 | 70±10    | 70±10 | 71±9     | 72±9  | 50±25    | 50±15 | 50±10    | 50±10 | 75±8     | 80±10 |
| 17    | Na, Mg, K, Ca, Mn, Sr, Zn, La, Ce, Pr, Nd, Eu, Tb, Dy, Tm, Yb, Lu                 | 75±9     | 80±10 | 82±8     | 82±9  | 65±10    | 70±10 | 20±30    | 40±20 | 70±10    | 70±10 | 70±10    | 70±10 | 40±25    | 50±20 | 50±10    | 55±10 | 75±8     | 80±10 |
| 16    | Na, Mg, K, Ca, Mn, Sr, Zn, La, Ce, Pr, Nd, Eu, Tb, Dy, Tm, Lu                     | 77±9     | 80±10 | 82±8     | 84±8  | 60±10    | 70±10 | 30±30    | 40±20 | 70±10    | 70±10 | 72±8     | 70±10 | 50±20    | 50±10 | 50±10    | 55±10 | 75±10    | 80±10 |
| 15    | Na, Mg, K, Ca, Mn, Sr, Zn, La, Ce, Pr, Nd, Eu, Tb, Tm, Lu                         | 78±9     | 77±9  | 82±8     | 83±9  | 65±10    | 70±10 | 20±30    | 40±20 | 70±10    | 70±10 | 70±10    | 70±10 | 50±20    | 50±15 | 50±10    | 50±10 | 77±9     | 80±10 |
| 14    | Na, Mg, K, Ca, Mn, Sr, Zn, La, Ce, Pr, Nd, Eu, Tb, Lu                             | 80±10    | 78±9  | 83±9     | 80±10 | 70±10    | 70±10 | 30±30    | 40±20 | 70±10    | 75±10 | 70±9     | 74±9  | 50±20    | 50±15 | 50±15    | 55±10 | 76±9     | 80±10 |
| 13    | Na, K, Ca, Mn, Sr, Zn, La, Ce, Pr, Nd, Eu, Tb, Lu                                 | 80±10    | 80±10 | 83±8     | 80±10 | 70±10    | 70±10 | 30±35    | 40±20 | 70±10    | 70±10 | 71±9     | 70±10 | 40±20    | 60±20 | 50±10    | 50±10 | 78±8     | 80±10 |
| 12    | Na, K, Ca, Mn, Sr, Zn, Ce, Pr, Nd, Eu, Tb, Lu                                     | 78±9     | 80±10 | 84±8     | 80±10 | 70±10    | 70±10 | 30±30    | 40±20 | 70±10    | 70±10 | 73±9     | 70±10 | 50±20    | 50±20 | 50±10    | 60±10 | 78±9     | 80±10 |
| 11    | Na, K, Ca, Mn, Sr, Zn, Ce, Nd, Eu, Tb, Lu                                         | 78±9     | 79±8  | 83±8     | 84±8  | 70±10    | 70±10 | 20±30    | 30±20 | 70±10    | 70±10 | 70±10    | 70±10 | 45±20    | 50±20 | 50±10    | 50±10 | 77±9     | 80±10 |
| 10    | Na, K, Ca, Mn, Sr, Ce, Nd, Eu, Tb, Lu                                             | 80±10    | 79±8  | 83±8     | 84±9  | 70±10    | 70±10 | 15±30    | 40±20 | 70±10    | 75±10 | 74±9     | 73±9  | 40±20    | 50±20 | 50±10    | 60±10 | 76±9     | 80±10 |
| 9     | Na, K, Ca, Mn, Sr, Ce, Nd, Eu, Lu                                                 | 77±8     | 80±10 | 84±7     | 80±10 | 60±10    | 66±9  | 20±30    | 30±20 | 70±10    | 70±10 | 72±9     | 70±10 | 50±20    | 60±10 | 50±10    | 50±10 | 73±9     | 80±10 |
| 8     | Na, K, Mn, Sr, Ce, Nd, Eu, Lu                                                     | 75±10    | 77±9  | 83±8     | 82±9  | 65±10    | 70±10 | 20±30    | 30±20 | 70±10    | 70±10 | 70±10    | 72±9  | 40±20    | 50±15 | 50±10    | 50±10 | 75±10    | 80±10 |
| 7     | Na, K, Mn, Sr, Ce, Eu, Lu                                                         | 75±10    | 78±9  | 83±7     | 84±9  | 65±10    | 69±9  | 20±30    | 30±20 | 70±10    | 70±10 | 69±8     | 70±10 | 40±30    | 50±20 | 50±10    | 50±10 | 74±9     | 80±10 |
| 6     | Na, K, Mn, Sr, Ce, Lu                                                             | 70±10    | 70±10 | 80±10    | 80±10 | 60±10    | 60±10 | 20±30    | 35±30 | 70±10    | 80±10 | 70±10    | 70±10 | 50±20    | 60±15 | 50±10    | 50±10 | 70±10    | 70±10 |
| 5     | Na, Mn, Sr, Ce, Lu                                                                | 71±9     | 70±10 | 80±7     | 82±9  | 60±10    | 60±10 | 20±30    | 40±25 | 60±10    | 60±10 | 60±10    | 60±10 | 50±25    | 60±20 | 50±10    | 50±10 | 65±10    | 70±15 |
| 4     | Mn, Sr, Ce, Lu                                                                    | 70±10    | 70±10 | 78±9     | 80±10 | 50±10    | 50±10 | 10±20    | 30±25 | 50±10    | 50±10 | 60±10    | 60±10 | 40±20    | 50±20 | 50±10    | 55±10 | 60±10    | 60±10 |
| 3     | Mn, Sr, Lu                                                                        | 70±10    | 70±10 | 80±10    | 80±10 | 50±10    | 60±10 | 10±20    | 20±20 | 55±10    | 50±10 | 60±10    | 60±10 | 40±20    | 45±15 | 50±10    | 50±10 | 60±10    | 60±10 |
| 2     | Mn, Lu                                                                            | 55±10    | 60±10 | 80±10    | 80±10 | 60±10    | 60±10 | 20±30    | 30±20 | 40±10    | 40±10 | 50±10    | 50±10 | 30±20    | 40±20 | 50±10    | 50±10 | 60±10    | 60±10 |

**Table S8. RF accuracy table for each set of predictors tested: geographical origin.**

| Index | Predictors                                                                        | ITA      |      | SPA      |       |
|-------|-----------------------------------------------------------------------------------|----------|------|----------|-------|
|       |                                                                                   | Training | Test | Training | Test  |
| 21    | Na, Mg, K, Ca, Mn, Sr, Zn, La, Ce, Pr, Nd, Sm, Eu, Gd, Tb, Dy, Ho, Er, Tm, Yb, Lu | 89±5     | 88±5 | 90±3     | 89±6  |
| 20    | Na, Mg, K, Ca, Mn, Sr, Zn, La, Ce, Pr, Nd, Sm, Eu, Gd, Tb, Dy, Er, Tm, Yb, Lu     | 89±4     | 90±3 | 88±3     | 89±7  |
| 19    | Na, Mg, Ca, Mn, Sr, Zn, La, Ce, Pr, Nd, Sm, Eu, Gd, Tb, Dy, Er, Tm, Yb, Lu        | 88±4     | 88±4 | 89±4     | 85±8  |
| 18    | Na, Mg, Ca, Mn, Sr, Zn, La, Ce, Pr, Nd, Sm, Eu, Gd, Tb, Dy, Er, Tm, Lu            | 88±5     | 88±4 | 90±3     | 89±5  |
| 17    | Na, Mg, Ca, Mn, Sr, Zn, La, Ce, Pr, Nd, Sm, Eu, Gd, Tb, Dy, Tm, Lu                | 87±4     | 89±3 | 88±3     | 86±8  |
| 16    | Na, Mg, Ca, Mn, Sr, Zn, La, Ce, Pr, Nd, Sm, Eu, Gd, Tb, Tm, Lu                    | 89±2     | 91±4 | 89±4     | 86±8  |
| 15    | Na, Mg, Ca, Mn, Sr, Zn, La, Ce, Pr, Nd, Sm, Eu, Gd, Tb, Lu                        | 88±5     | 91±3 | 89±4     | 91±5  |
| 14    | Na, Mg, Ca, Mn, Sr, Zn, Ce, Pr, Nd, Sm, Eu, Gd, Tb, Lu                            | 88±5     | 90±3 | 88±4     | 90±10 |
| 13    | Na, Mg, Ca, Mn, Sr, Zn, Ce, Pr, Nd, Eu, Gd, Tb, Lu                                | 89±5     | 88±5 | 87±5     | 91±5  |
| 12    | Na, Mg, Mn, Sr, Zn, Ce, Pr, Nd, Eu, Gd, Tb, Lu                                    | 89±5     | 88±3 | 87±4     | 94±5  |
| 11    | Na, Mg, Mn, Sr, Zn, Ce, Nd, Eu, Gd, Tb, Lu                                        | 89±4     | 89±5 | 89±5     | 89±5  |
| 10    | Na, Mg, Mn, Sr, Zn, Ce, Nd, Eu, Gd, Tb                                            | 88±3     | 89±5 | 89±5     | 91±4  |
| 9     | Na, Mg, Mn, Sr, Zn, Ce, Nd, Eu, Tb                                                | 91±3     | 88±4 | 92±3     | 91±5  |
| 8     | Na, Mg, Mn, Sr, Zn, Ce, Nd, Tb                                                    | 86±5     | 90±3 | 89±5     | 89±9  |
| 7     | Mg, Mn, Sr, Zn, Ce, Nd, Tb                                                        | 88±5     | 90±3 | 88±4     | 90±5  |
| 6     | Mn, Sr, Zn, Ce, Nd, Tb                                                            | 86±5     | 88±5 | 86±3     | 90±5  |
| 5     | Mn, Zn, Ce, Nd, Tb                                                                | 84±4     | 84±4 | 89±3     | 89±5  |
| 4     | Mn, Zn, Ce, Tb                                                                    | 86±6     | 84±4 | 85±3     | 88±6  |
| 3     | Mn, Zn, Ce                                                                        | 86±4     | 89±3 | 88±4     | 81±6  |
| 2     | Mn, Zn                                                                            | 77±8     | 73±7 | 76±7     | 80±10 |

Figure S1. Principal Component Analysis (PCA) performed using autoscaling as data pre-treatment. (A)

Loading plot; (B) Score plot.

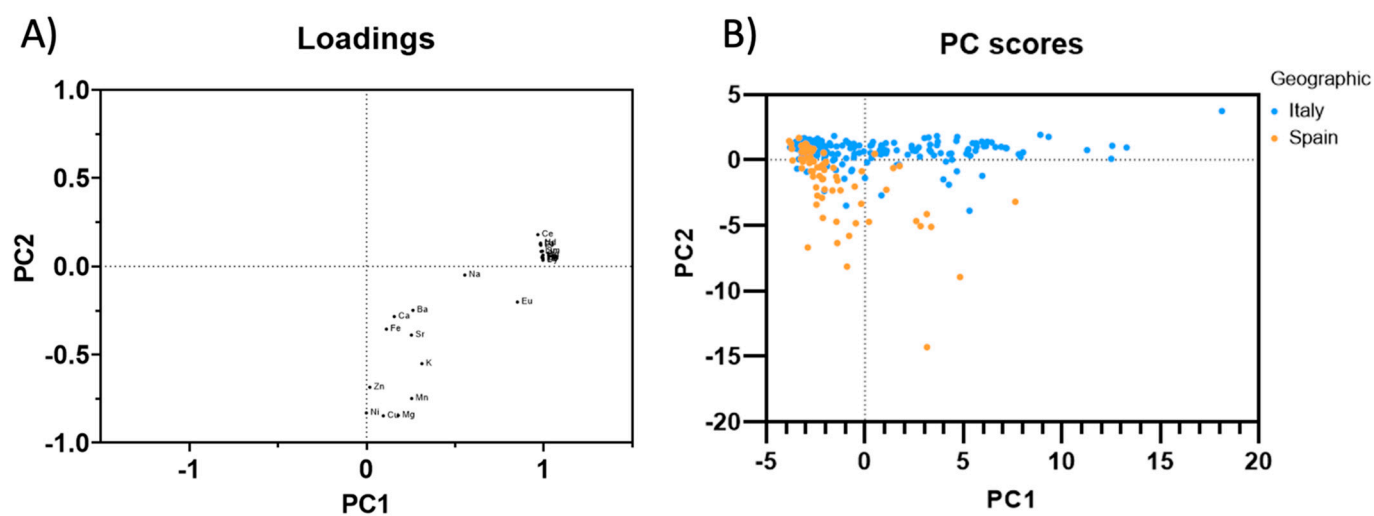

Figure S2. Proportion of variance (PCA using centered log-ratio transformation).

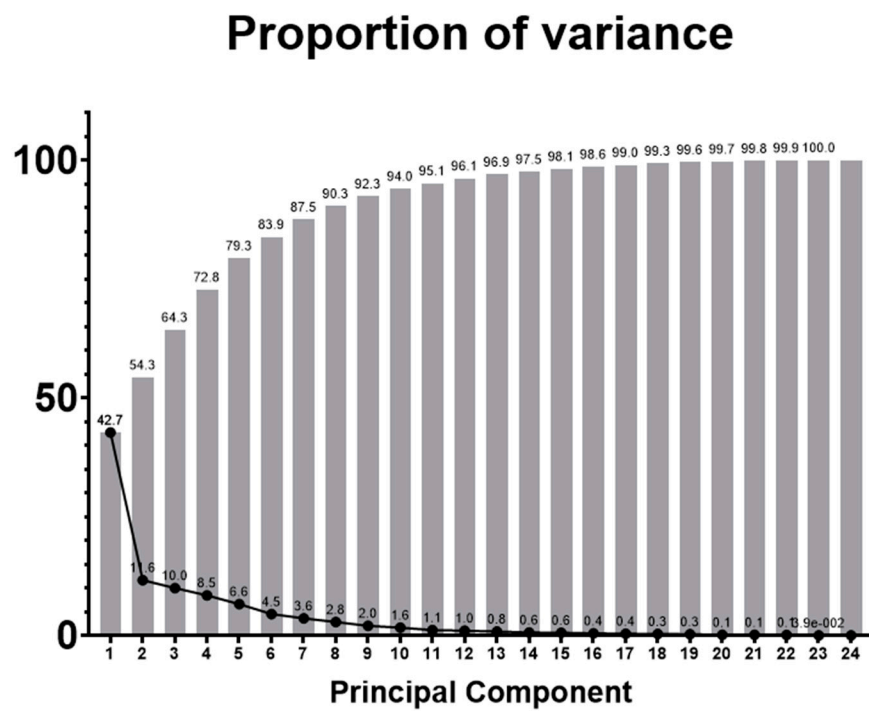

Supplement: s1 [file s1]
